# Supplementary material for: Dissolved Mn(III) is a key redox intermediate in sediments of a seasonally euxinic coastal basin
Source: Copernicus journal article supplement (doi:10.5194/egusphere-2024-1706), 2024-06-10
Supplement: Supplementary file 1 [file egusphere-2024-1706-supplement.zip]

# Supplements to: Dissolved Mn(III) is a key redox intermediate in sediments of a seasonally euxinic coastal basin

## 1. Detailed model description

5 The reactions in the model describe organic matter (OM) degradation involving a range of electron acceptors combined with secondary reactions of the reaction products (Table S5). Degradation of OM is facilitated, in successive order, by reduction of  $O_2$ ,  $NO_3^-$ ,  $MnO_2$ ,  $Fe(OH)_3$  and  $SO_4^{2-}$  and finally OM is degraded via methanogenesis (Table S2; Froelich et al., 1979; Reed et al., 2011; Rooze et al., 2016). Monod kinetics are used to describe the sequence of electron acceptors in OM degradation (Boudreau, 1997). In Monod kinetics, the oxidant with the highest metabolic free energy yield is used preferentially, until this  
10 species becomes limiting and the next oxidant in the sequence is used preferentially (Boudreau, 1996; Van Cappellen & Wang, 1996). The OM is assumed to include carbon (C), nitrogen (N) and phosphorus (P) in a ratio of C:N:P = 106:15.45:1 (based on Egger et al., 2016b). In the model, reduction of  $MnO_2$  can be coupled to oxidation of OM, Fe(II),  $H_2S$  and  $CH_4$  (Table S2). Reduction of  $MnO_2$  by OM, Fe(II) and  $H_2S$  is modelled as one electron transfer steps with Mn(III) as the product (Madison et al., 2013). Reduction of  $MnO_2$  by  $CH_4$  is modelled as a two electron transfer with Mn(II) as a product, because, to our  
15 knowledge, the one electron transfer step that is theoretically possible has never been demonstrated. Reduction of Mn(III) is assumed to occur with Fe(II),  $H_2S$  and OM to form Mn(II), while oxidation of Mn(III) is assumed to occur with  $O_2$  to form  $MnO_2$ . Oxidation of Mn(II) with  $O_2$  and precipitation as  $MnCO_3$  removes Mn(II). Dissolved inorganic carbon in the model is the sum of carbon in  $HCO_3^{2-}$  and  $CO_2$ , which are produced or consumed in reactions. Depending on whether a compound is a solid or solute, its generic mass conservation is described by Eq. 1 or Eq. 2,  
20 respectively.

$$(1 - \phi) \frac{\partial C_s}{\partial t} = -(1 - \phi)v \frac{\partial C_s}{\partial z} + \sum R_s \quad (1)$$

$$\phi \frac{\partial C_{aq}}{\partial t} = \phi D' \frac{\partial^2 C_{aq}}{\partial z^2} - \phi u \frac{\partial C_{aq}}{\partial z} + \sum R_{aq} \quad (2)$$

In these equations,  $\phi$  is the sediment porosity,  $t$  is time (yr),  $C_s$  and  $C_{aq}$  are the concentrations of the solid and dissolved species ( $mol\ L^{-1}$ ), respectively,  $D'$  is the diffusion coefficient of dissolved species in the porous medium ( $cm^2\ yr^{-1}$ ),  $z$  is the distance from the Sediment-Water Interface (SWI; cm),  $v$  and  $u$  ( $cm\ yr^{-1}$ ) are advective velocities of solids and dissolved species, respectively and  $\sum R_s$  and  $\sum R_{aq}$  are net rates of chemical reactions of solid and dissolved species, respectively.  
25 For porosity, a depth-dependent function is used to account for sediment compaction (Meysman et al., 2005; Reed 2011a) (eq 3):

$$\varphi(x) = \varphi_{\infty} + (\varphi_0 - \varphi_{\infty})e^{-\frac{y}{x}} \quad (3)$$

In this equation,  $\varphi_0$  is the porosity at the SWI,  $\varphi_{\infty}$  is the porosity at depth and  $y$  is the porosity attenuation factor/e-folding distance (Table 3).

- 30 In the last 20 years of the model run, the seasonal cycle of oxic – euxinic conditions was simulated by varying the bottom water  $O_2$  and  $H_2S$  concentration, the influx of Fe oxides, Mn oxides and OM and the sedimentation rate (Fig. S1). The boundary conditions for the bottom water concentration of  $O_2$  were based on monitoring by Rijkswaterstaat (Directorate-General for Public Works and Water Management of the Netherlands) as reported in Żygadłowska et al. (2023a). The bottom water  $H_2S$  was varied together with  $O_2$  and was either 0, or the concentration measured in the bottom water in September (111.8  $\mu M$ ).
- 35 Input of metal oxides was varied together with  $O_2$  and was fitted to the sediment profiles. OM input was varied to fit the sediment profiles. The input of OM and the sedimentation rate in April differ from those in the other oxic months, because a spring bloom is simulated. Sedimentation rates for the model run until 2014 (6 years before the end of the model) were based on Egger et al. (2016; 13.3  $cm\ yr^{-1}$ ). For the last 6 years the sedimentation rate was set to 20  $cm\ yr^{-1}$ , based on the onset of the shallowest peak in  $C_{org}$  at 20 cm depth (Fig. 4), which marks the  $C_{org}$  deposition of the previous year (i.e. spring 2019).

40

2. Figures

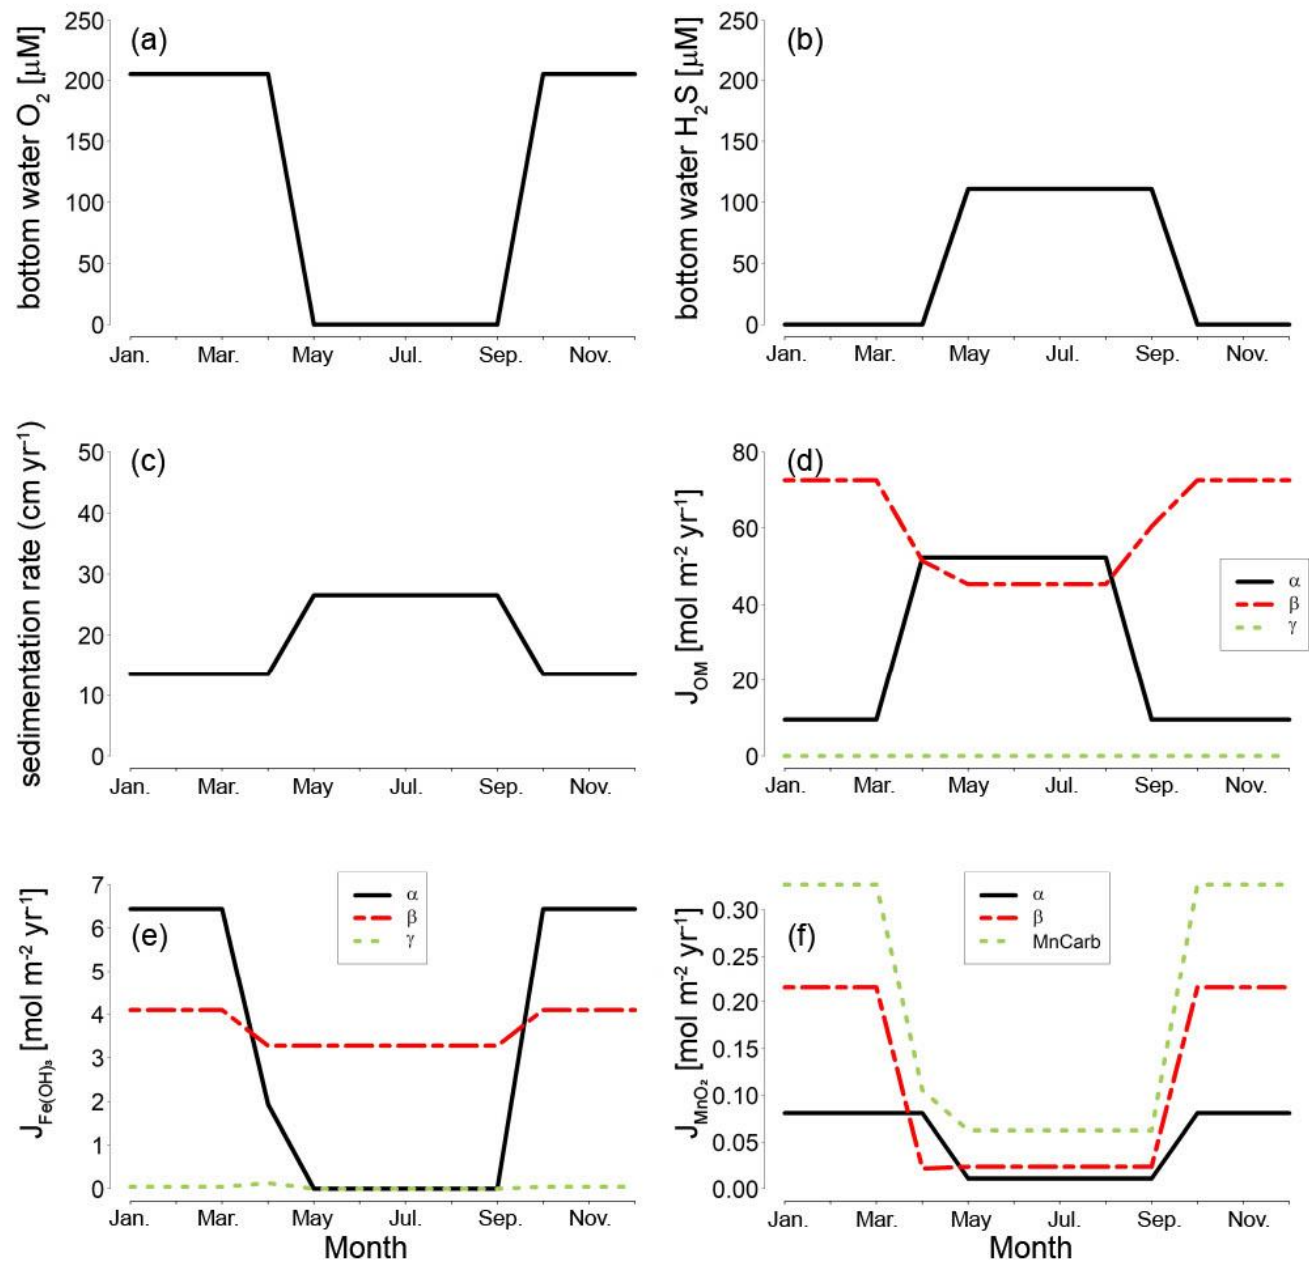

Figure S1. Seasonal variation in bottom water O<sub>2</sub> and H<sub>2</sub>S, sedimentation rate, and in the flux of Fe oxides ( $J_{Fe(OH)_3}$ ), flux of Mn oxides ( $J_{MnO_2}$ ) and flux of organic matter ( $J_{OM}$ ) at the sediment-water interface in the final year of the model simulations.

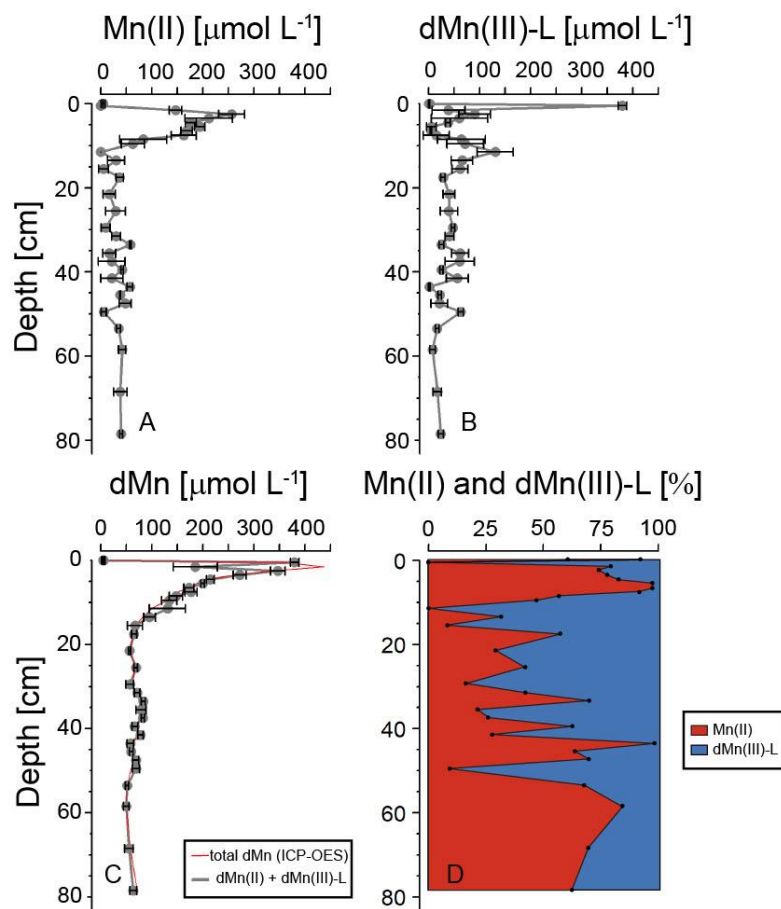

Figure S2: A, B) Data collected through spectrophotometric analysis of Mn(II) and dMn(III)-L in March, including error bars showing standard deviation (n=3). C) The sum of Mn(II) and dMn(III)-L measured spectrophotometrically, including error bars showing standard deviation (n=3), compared with the total dissolved Mn measured with ICP-OES. D) The contribution of Mn(II) and dMn(III)-L to the total dissolved Mn pool (determined as the sum of Mn(II) and dMn(III)-L) as percentage.

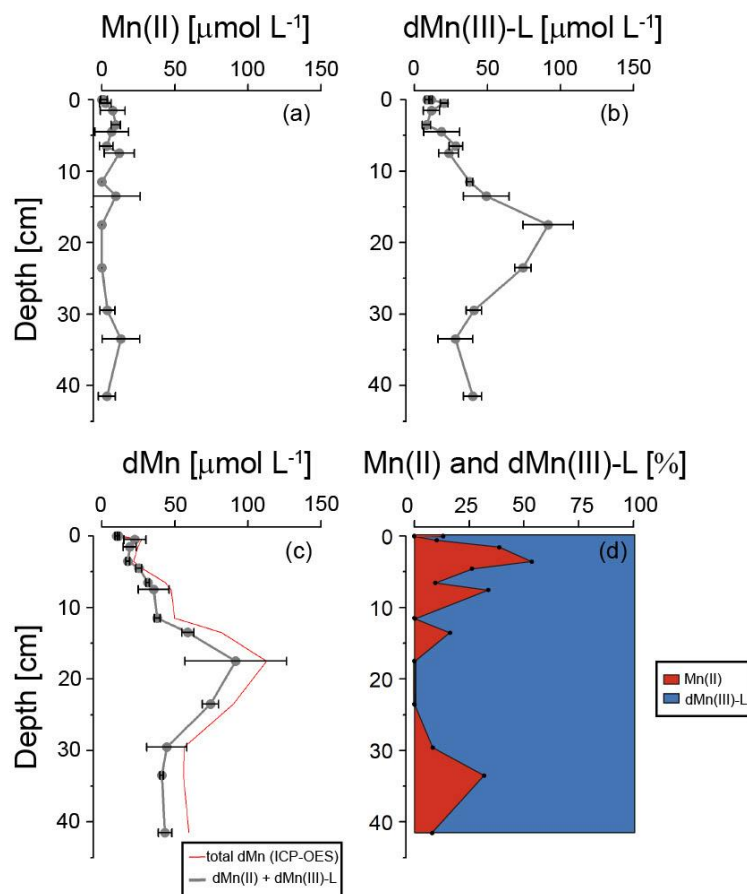

Figure S3: A, B) Data collected during the spectrophotometric analysis of Mn(II) and dMn(III)-L in September, including error bars showing standard deviation (n = 3). C) The sum of Mn(II) and dMn(III)-L measured during the spectrophotometric method including error bars (n = 3), compared with the total dissolved Mn measured with ICP-OES. D) The contribution of Mn(II) and dMn(III)-L to the total dissolved Mn pool (determined as the sum of Mn(II) and dMn(III)-L) as a percentage.

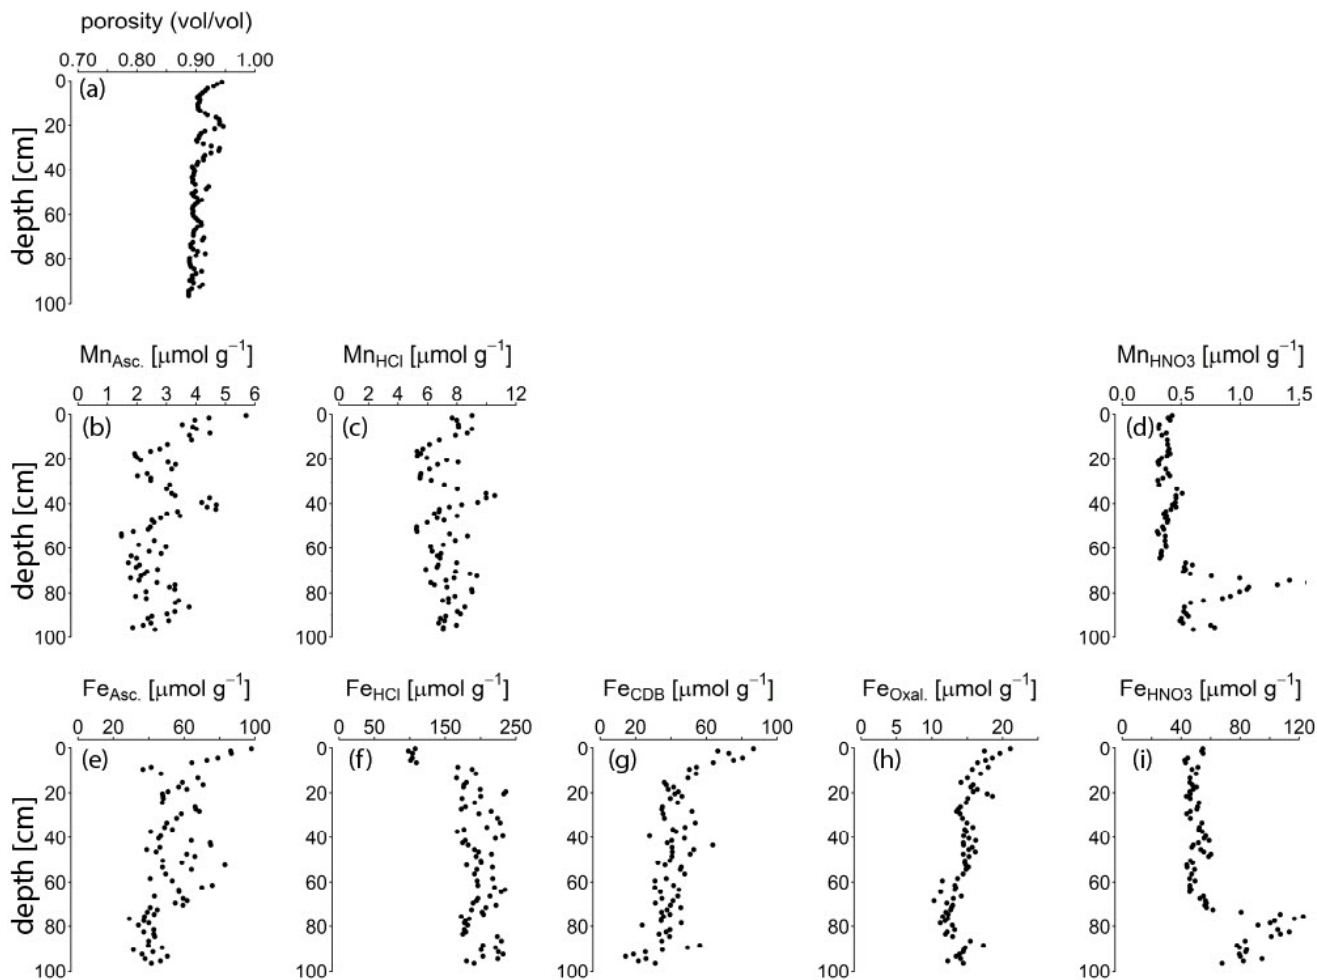

Figure S4: Porosity and all Mn and Fe fractions as determined in the sequential extraction, for the sediment collected in March 2020.

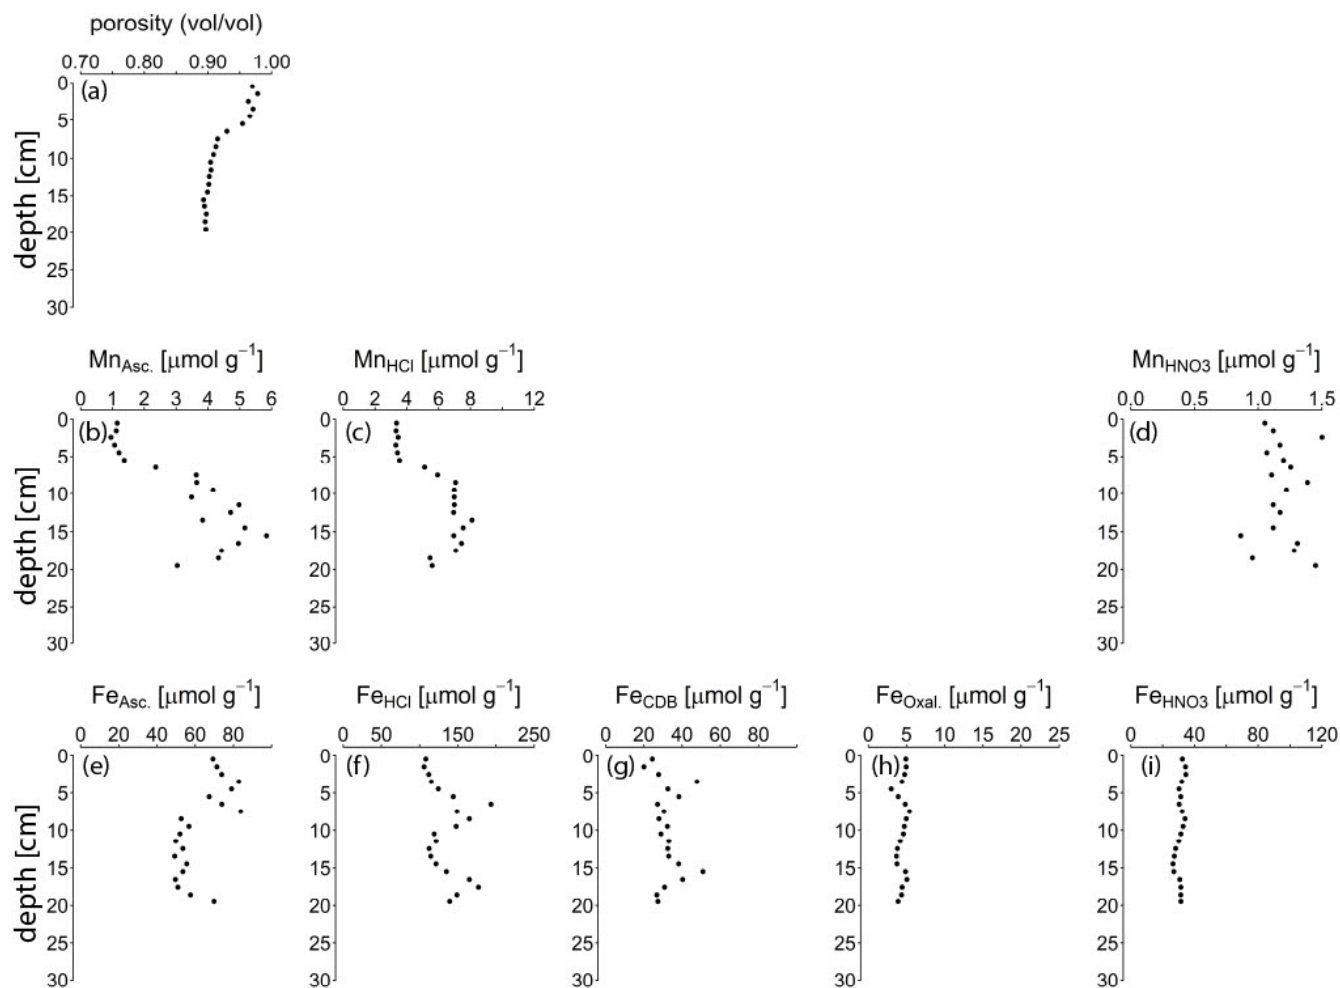

**Figure S5: Porosity and all fractions extracted for Mn and Fe in the sequential extraction, for the sediment collected in September 2020 (0-20 cm).**

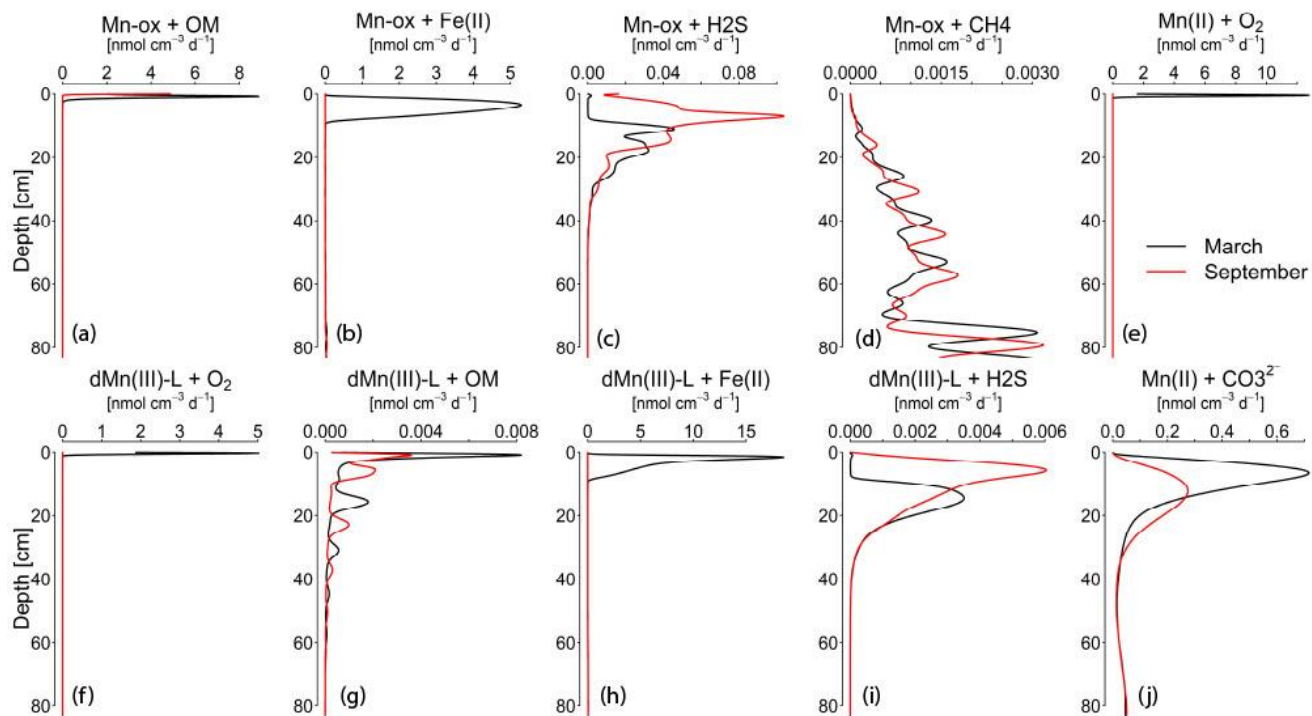

65 **Figure S6: Depth profiles of the reaction rates, which form the basis for the rate integrations shown in Fig. 4.**



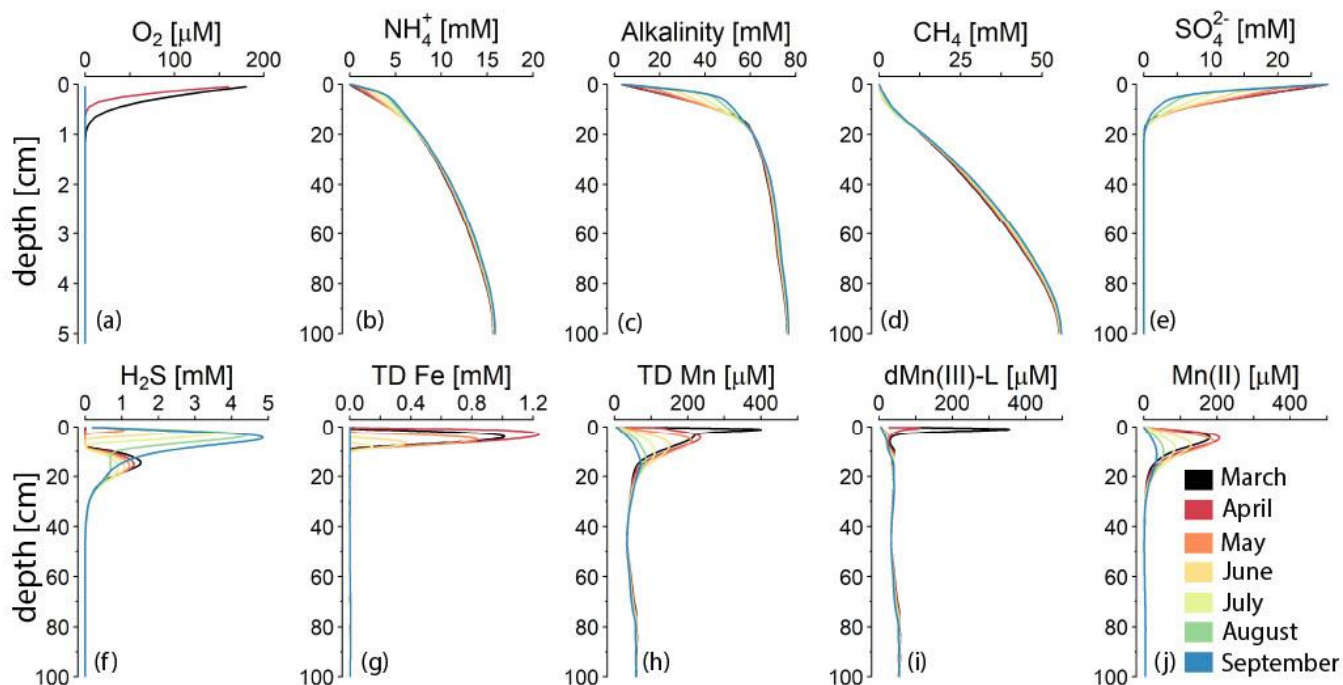

70 **Figure S7. The change in pore water profiles between March and September when anoxic conditions develop in the basin. With the reactive transport model, pore water profiles can be extrapolated to months where no fieldwork was done.**

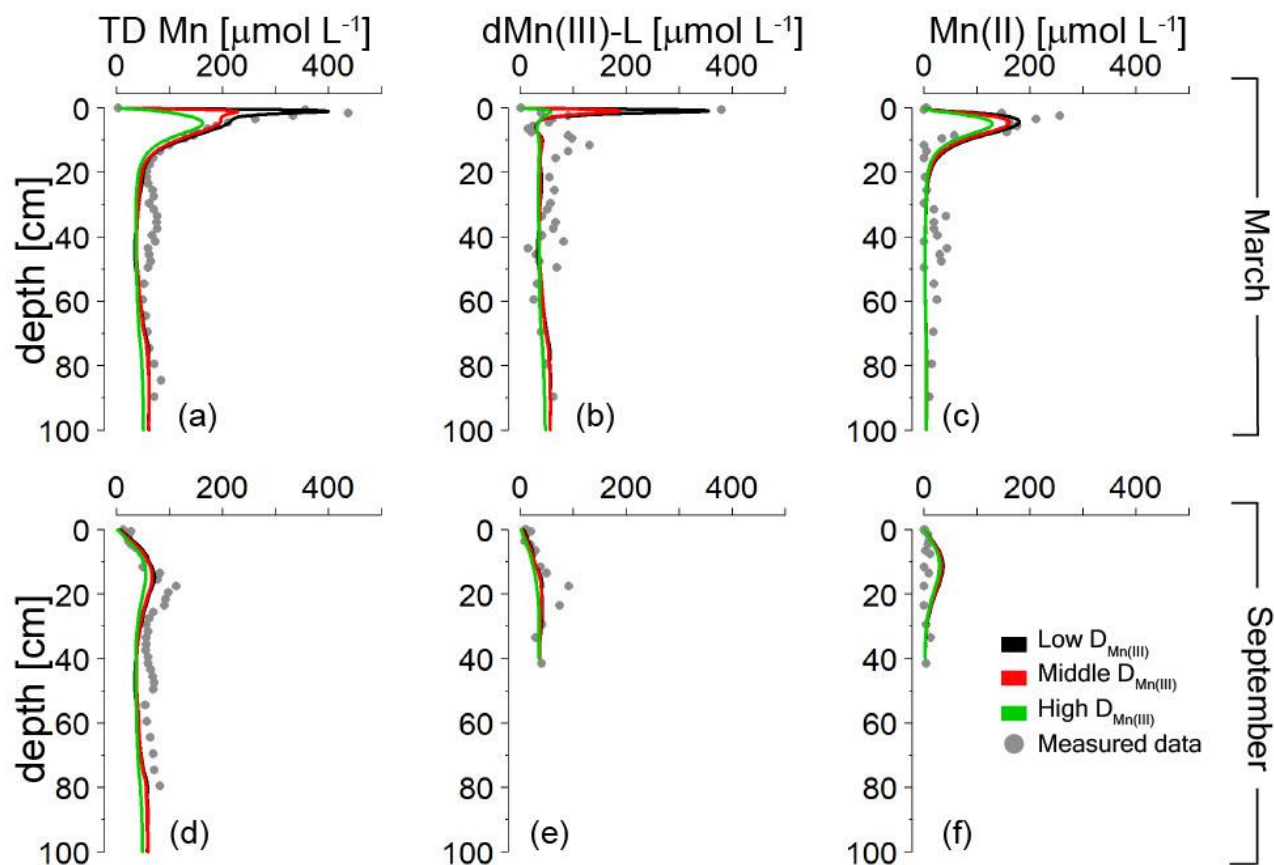

Figure S8: Model runs with different diffusion coefficients for dissolved Mn(III). The diffusion coefficients used and the range of diffusion coefficients for dissolved organic matter given in literature can be found in Table S6. When the diffusion coefficient decreases, the peak of dissolved Mn(III)-L and total dissolved Mn near the sediment-water interface in March is no longer well described by the model. The diffusion coefficient does not have a large effect on the pore water profiles of Mn(II) and dMn(III)-L in September.

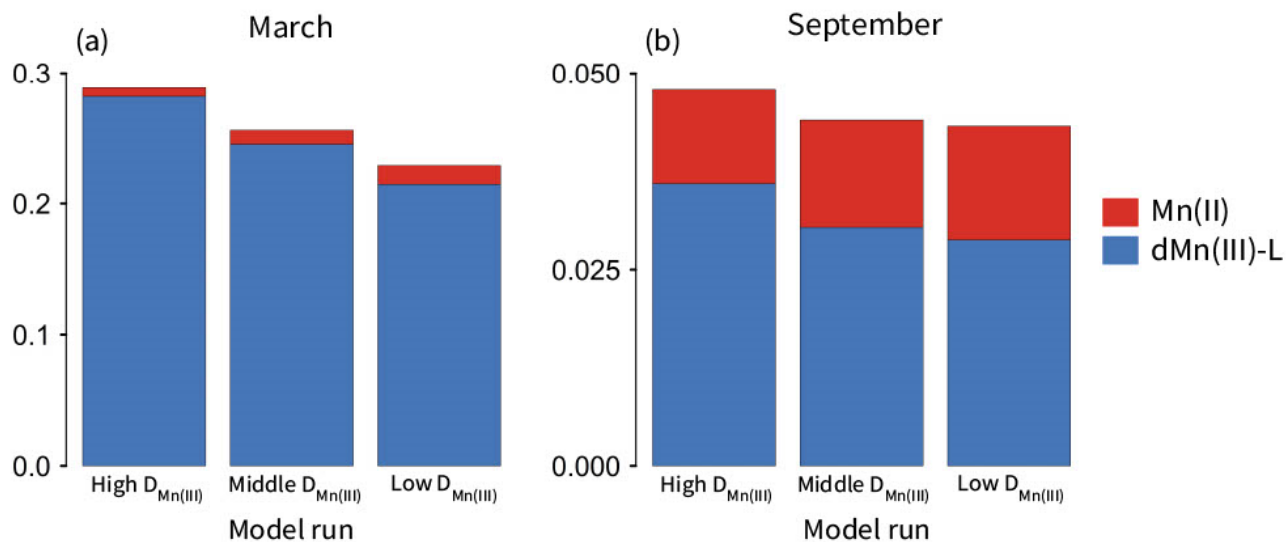

80 **Figure S9: Variation in the benthic flux of dissolved Mn over the model runs with changing diffusion coefficient for dMn(III)-L ( $D_{Mn(III)}$ ) in March (A) and September (B). Note the different y-axes for the different months. The figure shows that a lower diffusion coefficient for dMn(III)-L results in a lower benthic flux of total Mn and dMn(III)-L, but a slightly higher benthic flux of Mn(II). The values for the high, middle and low  $D_{Mn(III)}$  can be found in Table S6.**

Table S1. Chemical species included in the model

| Species                       | Notation                                                        |
|-------------------------------|-----------------------------------------------------------------|
| <b>Solids</b>                 |                                                                 |
| Organic Matter <sup>a</sup>   | OM <sup><math>\alpha/\beta/\gamma</math></sup>                  |
| Iron oxides <sup>a</sup>      | Fe(OH) <sub>3</sub> <sup><math>\alpha/\beta/\gamma</math></sup> |
| Iron monosulfide              | FeS                                                             |
| Pyrite                        | FeS <sub>2</sub>                                                |
| Elemental Sulfur              | S <sup>0</sup>                                                  |
| Siderite                      | FeCO <sub>3</sub>                                               |
| Vivianite                     | Fe <sub>3</sub> (PO <sub>4</sub> ) <sub>2</sub>                 |
| Manganese oxide <sup>b</sup>  | MnO <sub>2</sub> <sup><math>\alpha/\beta</math></sup>           |
| Manganese carbonate           | MnCO <sub>3</sub>                                               |
| <b>Solutes</b>                |                                                                 |
| Chloride                      | Cl <sup>-</sup>                                                 |
| Oxygen                        | O <sub>2</sub>                                                  |
| Nitrate                       | NO <sub>3</sub> <sup>-</sup>                                    |
| Sulfate                       | SO <sub>4</sub> <sup>2-</sup>                                   |
| Methane                       | CH <sub>4</sub>                                                 |
| Dissolved iron                | Fe <sup>2+</sup>                                                |
| Ammonium <sup>c</sup>         | ΣNH <sub>4</sub> <sup>+</sup>                                   |
| Hydrogen sulfide <sup>c</sup> | ΣH <sub>2</sub> S                                               |
| Phosphate <sup>c</sup>        | ΣH <sub>3</sub> PO <sub>4</sub>                                 |
| Dissolved Inorganic Carbon    | DIC                                                             |
| Dissolved manganese (II)      | Mn <sup>2+</sup>                                                |
| Dissolved manganese(III)-L    | Mn <sup>3+</sup>                                                |

<sup>a</sup> Consists of three types of species: reactive ( $\alpha$ ), less reactive ( $\beta$ ) and non-reactive ( $\gamma$ )

<sup>b</sup> Consists of two types of species: reactive ( $\alpha$ ) and less reactive ( $\beta$ )

<sup>c</sup> Σ denotes that all species of an acid are included.

**Table S2. Reaction pathways and stoichiometries implemented in the model**

|                                                                                                                                                |     |
|------------------------------------------------------------------------------------------------------------------------------------------------|-----|
| Primary redox reactions                                                                                                                        |     |
| $OM^{\alpha,\beta} + a O_2 \rightarrow a CO_2 + b NH_4^+ + c H_3PO_4 + a H_2O$                                                                 | R1  |
| $OM^{\alpha,\beta} + 0.8 a NO_3 + 0.8 a H^+ \rightarrow a CO_2 + b NH_4^+ + c H_3PO_4 + 0.4 a N_2 + 1.4 a H_2O$                                | R2  |
| $OM^{\alpha,\beta} + 4a MnO_2^a + 2 a H^+ \rightarrow 4a Mn^{3+} + a CO_2 + b NH_4^+ + c H_3PO_4 + 2 a H_2O$                                   | R3  |
| $OM^{\alpha,\beta} + 4a Fe(OH)_3^a + 4a \chi Fe_{ox}P + 12 a H^+ \rightarrow 4a Fe^{2+} + a CO_2 + b NH_4^+ + (c + 4a \chi)H_3PO_4 + 13a H_2O$ | R4  |
| $OM^{\alpha,\beta} + 0.5a SO_4^{2-} + a H^+ \rightarrow a CO_2 + b NH_4^+ + c H_3PO_4 + 0.5a H_2S + a H_2O$                                    | R5  |
| $OM^{\alpha,\beta} \rightarrow 0.5a CO_2 + b NH_4^+ + c H_3PO_4 + 0.5a CH_4$                                                                   | R6  |
| Secondary and other reactions                                                                                                                  |     |
| $O_2 + Fe^{2+} + 8 H_2O + 4 \chi H_3PO_4 \rightarrow 4 Fe(OH)_3^a + 4 \chi Fe_{ox}P + 8 CO_2$                                                  | R7  |
| $2 O_2 + FeS \rightarrow SO_4^{2-} + 2 Fe^{2+} + 4 H^+$                                                                                        | R8  |
| $7 O_2 + 2 FeS_2 + 2 H_2O + 4 SO_4^{2-} \rightarrow 2 Fe^{2+} + 4 H^+$                                                                         | R9  |
| $2 O_2 + H_2S + 2 HCO_3^- \rightarrow SO_4^{2-} + 2 CO_2 + 2 H_2O$                                                                             | R10 |
| $2 O_2 + CH_4 \rightarrow CO_2 + 2 H_2O$                                                                                                       | R11 |
| $2 Fe(OH)_3^a + 2 \chi Fe_{ox}P + H_2S + 4 CO_2 \rightarrow 2 Fe^{2+} + 2 \chi H_2PO_4^- + S^0 + 4 HCO_3^- + 2 H_2O$                           | R12 |
| $Fe^{2+} + H_2S \rightarrow FeS + 2 H^+$                                                                                                       | R13 |
| $FeS + H_2S \rightarrow FeS_2 + H_2$                                                                                                           | R14 |
| $SO_4^{2-} + CH_4 + CO_2 \rightarrow 2 HCO_3^- + H_2S$                                                                                         | R15 |
| $CH_4 + 8 Fe(OH)_3^{a,\beta} + 8 \chi Fe_{ox}P + 15 H^+ \rightarrow HCO_3^- + 8 Fe^{2+} + 8 \chi H_2PO_4^- + 21 H_2O$                          | R16 |
| $4 S^0 + 4 H_2O \rightarrow 3 H_2S + SO_4^{2-} + 2 H^+$                                                                                        | R17 |
| $FeS + S^0 \rightarrow FeS_2$                                                                                                                  | R18 |
| $Fe(OH)_3^a + \chi Fe_{ox}P \rightarrow Fe(OH)_3^\beta + \chi H_2PO_4^-$                                                                       | R19 |
| $2 Fe(OH)_3^\beta + 2 \chi Fe_{ox}P + H_2S + 4 CO_2 \rightarrow 2 Fe^{2+} + 2 \chi H_2PO_4^- + S^0 + 4 HCO_3^- + 2 H_2O$                       | R20 |
| $2 O_2 + NH_4^+ + 2 HCO_3^- \rightarrow NO_3^- + 2 CO_2 + 3 H_2O$                                                                              | R21 |
| $3 Fe^{2+} + 2 H_2PO_4^- \rightarrow Fe_3(PO_4)_2 + 4 H^+$                                                                                     | R22 |
| $Fe^{2+} + CO_3^{2-} \rightarrow FeCO_3$                                                                                                       | R23 |
| $FeCO_3 + H_2S \rightarrow FeS + CO_2 + H_2O$                                                                                                  | R24 |
| $Fe_3(PO_4)_2 + 3 H_2S \rightarrow 2 FeS + 2 HPO_4^- + 4 H^+$                                                                                  | R25 |
| $Mn^{2+} + HCO_3^- + OH^- \rightarrow MnCO_3 + H_2O$                                                                                           | R26 |
| $4 Mn^{2+} + O_2 + 4 H^+ + L \rightarrow 4 Mn^{3+} - L + 2 H_2O$                                                                               | R27 |

|                                                                                                                                                         |     |
|---------------------------------------------------------------------------------------------------------------------------------------------------------|-----|
| $\text{MnO}_2^{a,\beta} + \text{Fe}^{2+} + \text{H}_2\text{O} + \text{H}^+ + \text{L} \rightarrow \text{Fe}(\text{OH})_3^a + \text{Mn}^{3+} - \text{L}$ | R28 |
| $\text{MnO}_2^a + \text{H}_2\text{S} + 2 \text{H}^+ + \text{L} \rightarrow \text{S}^0 + \text{Mn}^{3+} - \text{L} + 2 \text{H}_2\text{O}$               | R29 |
| $\text{MnO}_2^a \rightarrow \text{MnO}_2^\beta$                                                                                                         | R30 |
| $\text{MnO}_2^\beta + \text{H}_2\text{S} + 2 \text{H}^+ + \text{L} \rightarrow \text{S}^0 + \text{Mn}^{3+} - \text{L} + 2 \text{H}_2\text{O}$           | R31 |
| $4 \text{MnO}_2^{a,\beta} + \text{CH}_4 + 7 \text{H}^+ \rightarrow 4 \text{Mn}^{2+} + \text{HCO}_3^- + 5 \text{H}_2\text{O}$                            | R32 |
| $4 \text{Mn}^{3+} - \text{L} + 2 \text{O}_2 + 4 \text{H}^+ \rightarrow 4 \text{MnO}_2^a + 2 \text{H}_2\text{O} + \text{L}$                              | R33 |
| $\text{Mn}^{3+} - \text{L} + \text{H}_2\text{S} \rightarrow \text{S}^0 + \text{Mn}^{2+} + \text{L}$                                                     | R34 |
| $\text{Mn}^{3+} - \text{L} + \text{Fe}^{2+} + 3 \text{H}_2\text{O} \rightarrow \text{Mn}^{2+} + \text{Fe}(\text{OH})_3^a + 3 \text{H}^+ + \text{L}$     | R35 |
| $4 \text{Mn}^{3+} - \text{L} + \text{OM}^a + \text{H}_2\text{O} \rightarrow 4 \text{Mn}^{2+} + \text{CO}_2 + 3 \text{H}^+ + \text{L}$                   | R36 |

95 Organic matter is of the form  $((\text{CH}_2\text{O})_a (\text{NH}_4^+)_b (\text{H}_3\text{PO}_4)_c)$ , where  $a=1$ ,  $b= 1/15.45$  and  $c = 106/1$ .  $\alpha$ ,  $\beta$ , &  $\gamma$  describe different fractions (i.e. highly reactive, less reactive and refractory).  $\chi$  describes the P:Fe ratios of  $\text{Fe}(\text{OH})_3$  and has a value of 0.3 in the model.

**Table S3. Reaction equations implemented in the model**

| Primary redox reaction equations                                                                                                                                                                                                                                                                                                                                                                                                                                                   |    |
|------------------------------------------------------------------------------------------------------------------------------------------------------------------------------------------------------------------------------------------------------------------------------------------------------------------------------------------------------------------------------------------------------------------------------------------------------------------------------------|----|
| $\text{R1} = k_{\alpha,\beta} \text{OM}^{\alpha,\beta} \left( \frac{[\text{O}_2]}{K_{m,\text{O}_2} + [\text{O}_2]} \right)$                                                                                                                                                                                                                                                                                                                                                        | E1 |
| $\text{R2} = k_{\alpha,\beta} \text{OM}^{\alpha,\beta} \left( \frac{[\text{NO}_3^-]}{K_{m,\text{NO}_3^-} + [\text{NO}_3^-]} \right) \left( \frac{[\text{O}_2]}{K_{m,\text{O}_2} + [\text{O}_2]} \right)$                                                                                                                                                                                                                                                                           | E2 |
| $\text{R3} = k_{\alpha,\beta} \text{OM}^{\alpha,\beta} \left( \frac{[\text{MnO}_2]}{K_{m,\text{MnO}_2} + [\text{MnO}_2]} \right) \left( \frac{[\text{NO}_3^-]}{K_{m,\text{NO}_3^-} + [\text{NO}_3^-]} \right) \left( \frac{[\text{O}_2]}{K_{m,\text{O}_2} + [\text{O}_2]} \right)$                                                                                                                                                                                                 | E3 |
| $\text{R4} = k_{\alpha,\beta} \text{OM}^{\alpha,\beta} \left( \frac{[\text{Fe}(\text{OH})_3]}{K_{m,\text{Fe}(\text{OH})_3} + [\text{Fe}(\text{OH})_3]} \right) \left( \frac{[\text{MnO}_2]}{K_{m,\text{MnO}_2} + [\text{MnO}_2]} \right) \left( \frac{[\text{NO}_3^-]}{K_{m,\text{NO}_3^-} + [\text{NO}_3^-]} \right) \left( \frac{[\text{O}_2]}{K_{m,\text{O}_2} + [\text{O}_2]} \right)$                                                                                         | E4 |
| $\text{R5} = k_{\alpha,\beta} \text{OM}^{\alpha,\beta} \left( \frac{[\text{SO}_4^{2-}]}{K_{m,\text{SO}_4^{2-}} + [\text{SO}_4^{2-}]} \right) \left( \frac{[\text{Fe}(\text{OH})_3]}{K_{m,\text{Fe}(\text{OH})_3} + [\text{Fe}(\text{OH})_3]} \right) \left( \frac{[\text{MnO}_2]}{K_{m,\text{MnO}_2} + [\text{MnO}_2]} \right) * \left( \frac{[\text{NO}_3^-]}{K_{m,\text{NO}_3^-} + [\text{NO}_3^-]} \right) \left( \frac{[\text{O}_2]}{K_{m,\text{O}_2} + [\text{O}_2]} \right)$ | E5 |

|                                                                                                                                                                                                                                                                                                                                               |     |
|-----------------------------------------------------------------------------------------------------------------------------------------------------------------------------------------------------------------------------------------------------------------------------------------------------------------------------------------------|-----|
| $R6 = k_{\alpha,\beta} OM^{\alpha,\beta} \left( \frac{K_{m,SO_4^{2-}}}{K_{m,SO_4^{2-}} + [SO_4^{2-}]} \right) \left( \frac{[Fe(OH)_3]}{K_{m,Fe(OH)_3} + [Fe(OH)_3]} \right) \left( \frac{[MnO_2]}{K_{m,MnO_2} + [MnO_2]} \right) \\ * \left( \frac{[NO_3^-]}{K_{m,NO_3^-} + [NO_3^-]} \right) \left( \frac{[O_2]}{K_{m,O_2} + [O_2]} \right)$ | E6  |
| <b>Secondary redox and other reaction equations</b>                                                                                                                                                                                                                                                                                           |     |
| $R7 = k_1 [O_2] [Fe^{2+}]$                                                                                                                                                                                                                                                                                                                    | E7  |
| $R8 = k_2 [O_2] [FeS]$                                                                                                                                                                                                                                                                                                                        | E8  |
| $R9 = k_3 [O_2] [FeS_2]$                                                                                                                                                                                                                                                                                                                      | E9  |
| $R10 = k_4 [O_2] [\sum H_2S]$                                                                                                                                                                                                                                                                                                                 | E10 |
| $R11 = k_5 [O_2] [CH_4]$                                                                                                                                                                                                                                                                                                                      | E11 |
| $R12 = k_6 [Fe(OH)_3^{\alpha}] [\sum H_2S]$                                                                                                                                                                                                                                                                                                   | E12 |
| $R13 = k_7 [Fe^{2+}] [\sum H_2S]$                                                                                                                                                                                                                                                                                                             | E13 |
| $R14 = k_8 [FeS] [\sum H_2S]$                                                                                                                                                                                                                                                                                                                 | E14 |
| $R15 = k_9 [SO_4^{2-}] [CH_4]$                                                                                                                                                                                                                                                                                                                | E15 |
| $R16 = k_{10} [Fe(OH)_3^{\alpha,\beta}] [CH_4]$                                                                                                                                                                                                                                                                                               | E16 |
| $R17 = k_{11} [S^0]$                                                                                                                                                                                                                                                                                                                          | E17 |
| $R18 = k_{12} [FeS] [S^0]$                                                                                                                                                                                                                                                                                                                    | E18 |
| $R19 = k_{13} [Fe(OH)_3^{\alpha}]$                                                                                                                                                                                                                                                                                                            | E19 |
| $R20 = k_{14} [Fe(OH)_3^{\beta}] [\sum H_2S]$                                                                                                                                                                                                                                                                                                 | E20 |
| $R21 = k_{15} [O_2] [NH_4^+]$                                                                                                                                                                                                                                                                                                                 | E21 |
| $R22 = k_{16} [Fe^{2+}] [HPO_4^{2-}]$                                                                                                                                                                                                                                                                                                         | E22 |
| $R23 = k_{17} [Fe^{2+}] [HCO_3^-]$                                                                                                                                                                                                                                                                                                            | E23 |

|                                                                            |     |
|----------------------------------------------------------------------------|-----|
| $R24 = k_{18} [\text{FeCO}_3] [\sum \text{H}_2\text{S}]$                   | E24 |
| $R25 = k_{19} [\text{Fe}_3(\text{PO}_4)_2] [\sum \text{H}_2\text{S}]$      | E25 |
| $R26 = k_{20} [\text{Mn}^{2+}] [\text{HCO}_3^-]$                           | E26 |
| $R27 = k_{21} [\text{Mn}^{2+}] [\text{O}_2]$                               | E27 |
| $R28 = k_{22} [\text{Mn}(\text{OH})_4^{\alpha,\beta}] [\text{Fe}^{2+}]$    | E28 |
| $R29 = k_{23} [\text{Mn}(\text{OH})_4^{\alpha}] [\sum \text{H}_2\text{S}]$ | E29 |
| $R30 = k_{24} [\text{Mn}(\text{OH})_4^{\alpha}]$                           | E30 |
| $R31 = k_{25} [\text{Mn}(\text{OH})_4^{\beta}] [\sum \text{H}_2\text{S}]$  | E31 |
| $R32 = k_{26} [\text{Mn}(\text{OH})_4^{\alpha,\beta}] [\text{CH}_4]$       | E32 |
| $R33 = k_{27} [\text{Mn}^{3+}] [\text{O}_2]$                               | E33 |
| $R34 = k_{28} [\text{Mn}^{3+}] [\sum \text{H}_2\text{S}]$                  | E34 |
| $R35 = k_{29} [\text{Mn}^{3+}] [\text{Fe}^{2+}]$                           | E35 |
| $R36 = k_{30} [\text{CO}_2] [\text{H}_2]$                                  | E36 |
| $R37 = k_{31} [\text{OM}^{\alpha}]$                                        | E37 |
| $R38 = k_{32} [\text{NO}_3^-][\text{CH}_4]$                                | E38 |
| $R39 = k_{33} [\text{Mn}^{3+}][\text{OM}^{\alpha}]$                        | E39 |

100 **Table S4. Reaction parameters used in the model**

| Parameter           | Value  | Unit                   | Source | Values in literature |
|---------------------|--------|------------------------|--------|----------------------|
| $k_{\alpha}^*$      | 1.62   | $\text{yr}^{-1}$       | a, b   | 0.05 – 1.62          |
| $k_{\beta}^*$       | 0.0086 | $\text{yr}^{-1}$       | b, d   | 0.0025 - 0.0086      |
| $K_{\text{O}_2}$    | 20     | $\mu\text{mol L}^{-1}$ | c      | 1 – 30               |
| $K_{\text{NO}_3^-}$ | 20     | $\mu\text{mol L}^{-1}$ | c      | 4 – 80               |



|                              |                       |                        |         |                               |
|------------------------------|-----------------------|------------------------|---------|-------------------------------|
| $K_{\text{Mn}(\text{OH})_4}$ | 32                    | $\mu\text{mol L}^{-1}$ | c       | 4 – 32                        |
| $K_{\text{Fe}(\text{OH})_3}$ | 65                    | $\mu\text{mol L}^{-1}$ | c       | 65 – 100                      |
| $K_{\text{SO}_4^{2-}}$       | 1.6                   | $\mu\text{mol L}^{-1}$ | c       | 1.6                           |
| $k_1$ (E7)                   | $1.4 \times 10^5$     | $\text{mmol yr}^{-1}$  | c       | $1.4 \times 10^5$             |
| $k_2$ (E8)                   | 300                   | $\text{mmol yr}^{-1}$  | c       | 300                           |
| $k_3$ (E9)                   | 1                     | $\text{mmol yr}^{-1}$  | c       | 1                             |
| $k_4$ (E10)                  | 160                   | $\text{mmol yr}^{-1}$  | c       | 160                           |
| $k_5$ (E11)                  | 100                   | $\text{mmol yr}^{-1}$  | c       | 107                           |
| $k_6$ (E12)                  | 80                    | $\text{mmol yr}^{-1}$  | c, g, i | 8 - 100                       |
| $k_7$ (E13)                  | 11840                 | $\text{mmol yr}^{-1}$  | b, d    | 100 - 14800                   |
| $k_8$ (E14)                  | 0.0003                | $\text{mmol yr}^{-1}$  | e, i    | 0.0003 – 0.0074               |
| $k_9$ (E15)                  | 1.344                 | $\text{mmol yr}^{-1}$  | c, g    | 10 (c) – 120 (g)              |
| $k_{10}$ (E16)               | $3.04 \times 10^{-6}$ | $\text{mmol yr}^{-1}$  | g, i    | $1.6 \times 10^{-7}$ – 0.0074 |
| $k_{11}$ (E17)               | 3                     | $\text{yr}^{-1}$       | f       | 3                             |
| $k_{12}$ (E18)               | 0.1                   | $\text{mmol yr}^{-1}$  | f, g    | 0.001 - 7                     |
| $k_{13}$ (E19)               | 0.1                   | $\text{yr}^{-1}$       |         | model constrained             |
| $k_{14}$ (E20)               | 0.444                 | $\text{mmol yr}^{-1}$  | c, j    | 0.004 – 100                   |
| $k_{15}$ (E21)               | 19500                 | $\text{mmol yr}^{-1}$  | c, d    | 5000 – 39000                  |
| $k_{16}$ (E22)               | 0.052                 | $\text{mmol yr}^{-1}$  |         | model constrained             |
| $k_{17}$ (E23)               | 0.000351              | $\text{mmol yr}^{-1}$  | i       | 0.0027                        |
| $k_{18}$ (E24)               | 0.0008                | $\text{mmol yr}^{-1}$  |         | model constrained             |
| $k_{19}$ (E25)               | $8 \times 10^{-4}$    | $\text{mmol yr}^{-1}$  | i       | $8 \times 10^{-4}$            |
| $k_{20}$ (E26)               | 0.05565               | $\text{mmol yr}^{-1}$  | k       | 0.265                         |
| $k_{21}$ (E27)               | 15000                 | $\text{mmol yr}^{-1}$  | c       | 800 - 20000                   |
| $k_{22}$ (E28)               | 2.652                 | $\text{mmol yr}^{-1}$  | f, k    | 0.002 - 2                     |
| $k_{23}$ (E29)               | 1                     | $\text{mmol yr}^{-1}$  | c       | < 100000 (20)                 |
| $k_{24}$ (E30)               | 1.8                   | $\text{yr}^{-1}$       | f       | 1.8                           |
| $k_{25}$ (E31)               | 0.02                  | $\text{mmol yr}^{-1}$  | c       | < 100000 (20)                 |
| $k_{26}$ (E32)               | 0.000019              | $\text{mmol yr}^{-1}$  | k       | 0.0017                        |
| $k_{27}$ (E33)               | 144                   | $\text{mmol yr}^{-1}$  |         | model constrained             |
| $k_{28}$ (E34)               | 64                    | $\text{mmol yr}^{-1}$  |         | model constrained             |

|                |                      |                       |  |                   |
|----------------|----------------------|-----------------------|--|-------------------|
| $k_{29}$ (E35) | 0.025                | mmol yr <sup>-1</sup> |  | model constrained |
| $k_{30}$ (E36) | 0.03675              | yr <sup>-1</sup>      |  | model constrained |
| $k_{31}$ (E37) | 0.15                 | yr <sup>-1</sup>      |  | model constrained |
| $k_{32}$ (E38) | 0.5                  | mmol yr <sup>-1</sup> |  | model constrained |
| $k_{33}$ (E39) | 2.5*10 <sup>-4</sup> | mmol yr <sup>-1</sup> |  | model constrained |

a) Moodley et al. (2005); b) Reed et al. (2011a) c) Van Cappellen & Wang (1996); d) Reed et al. (2016); e) Rickard (1997); f) Berg et al. (2003); g) Rooze et al. (2016); h) Egger et al. (2016a); i) Egger et al. (2016b); j) Lenstra et al. (2018)

105 \*Following the approach of Reed et al. (2011b), we have assumed different reactivities of the organic matter towards the electron acceptors. The following factors have been used for the  $\alpha$  fraction: O<sub>2</sub> = 1, NO<sub>3</sub> = 3, MnO<sub>2</sub> = 2.8, Fe(OH)<sub>3</sub> = 0.3, SO<sub>4</sub><sup>2-</sup> = 1.7, methanogenesis = 0.5; for the  $\beta$  fraction the following factors have been used: O<sub>2</sub> = 1, NO<sub>3</sub><sup>-</sup> = 3, MnO<sub>2</sub> = 1, Fe(OH)<sub>3</sub> = 0.3, SO<sub>4</sub><sup>2-</sup> = 1, methanogenesis = 3.

110 **Table S5. Environmental parameters used in the model. Values of porosity, temperature, salinity and the sedimentation rate are based on data for the study site.**

| Parameter                                                | Symbol        | Value                              | Unit                                |
|----------------------------------------------------------|---------------|------------------------------------|-------------------------------------|
| Porosity at surface                                      | $\phi_0$      | 0.944                              | vol/vol                             |
| Porosity at depth                                        | $\phi_\infty$ | 0.888                              | -                                   |
| Porosity e-folding distance                              | g             | 60                                 | cm                                  |
| Sediment density                                         | r             | 2.65                               | g cm <sup>-3</sup>                  |
| Temperature                                              | T             | 8.4                                | °C                                  |
| Salinity                                                 | S             | 35                                 | -                                   |
| Pressure                                                 | P             | 5.5                                | bar                                 |
| Tortuosity                                               | $q^2$         | $1 - 2\ln(\phi)$                   | -                                   |
| Molecular diffusion coefficient corrected for tortuosity | $D'$          | $D' = \frac{D_m}{\theta^2}$        | cm <sup>2</sup> yr <sup>-1</sup>    |
| Sediment accumulation rate**                             | $F_{Sed}$     | **                                 | g cm <sup>-2</sup> yr <sup>-1</sup> |
| Advective velocity at surface                            | $n_0$         | $\frac{F_{Sed}}{\rho(1 - \phi_0)}$ | cm yr <sup>-1</sup>                 |

|                                                 |                 |                                              |                                     |
|-------------------------------------------------|-----------------|----------------------------------------------|-------------------------------------|
| Advective velocity at depth                     | $n_{\infty}$    | $\frac{F_{sed}}{\rho(1 - \varphi_{\infty})}$ | cm yr <sup>-1</sup>                 |
| ** Sedimentation rate variations over the years |                 |                                              |                                     |
| Year                                            | December – July | July - December                              | Unit                                |
| 0 – 60                                          | 2.97            | 2.97                                         | g cm <sup>-2</sup> yr <sup>-1</sup> |
| 60 – 75                                         | 0.69            | 3.93                                         | g cm <sup>-2</sup> yr <sup>-1</sup> |
| 75 – 80                                         | 3.93            | 2.00                                         | g cm <sup>-2</sup> yr <sup>-1</sup> |

**Table S6. The various diffusion coefficients used for Mn(III) ( $D_{Mn(III)}$ ) to evaluate the effect of the choice of the diffusion coefficient for Mn(III) when it forms a complex with an organic ligand.**

| Name                 | Scenario                                                                                                                                                 | Value                                  | Range in literature                        | Sources     |
|----------------------|----------------------------------------------------------------------------------------------------------------------------------------------------------|----------------------------------------|--------------------------------------------|-------------|
| High $D_{Mn(III)}$   | $DMn(III) = DMn(II)$<br>As calculated by reactran package                                                                                                | 132.6 cm <sup>2</sup> yr <sup>-1</sup> | -                                          | <i>a</i>    |
| Middle $D_{Mn(III)}$ | $DMn(III)$ is within the range of diffusion coefficients for dissolved organic matter                                                                    | 33.1 cm <sup>2</sup> yr <sup>-1</sup>  | 22.7 – 81 cm <sup>2</sup> yr <sup>-1</sup> | <i>b, c</i> |
| Low $D_{Mn(III)}$    | $DMn(III)$ is constrained by the model, by fitting Mn(III) to the collected data. This is the $DMn(III)$ that is used in the model throughout the paper. | 16.6 cm <sup>2</sup> yr <sup>-1</sup>  | -                                          |             |

Sources: *a*) Soetaert & Meysman (2012); *b*) Burdige et al. (1999); *c*) Burdige et al. (2004)

**Table S7. Boundary conditions of solids and solutes at the sediment-water interface in the model. For the time-dependent fluxes of  $OM^{\alpha,\beta,\gamma}$ ,  $Fe(OH)_3^{\alpha,\beta,\gamma}$ ,  $MnO_2^{\alpha,\beta}$  and  $MnCO_3$  and concentration of  $O_2$  the minimum and maximum fluxes and concentrations are given. For all chemical species, a zero-gradient boundary condition was specified at the bottom of the model domain.**

| Solids                                          | Flux at sediment-water interface |       | Unit                                 |
|-------------------------------------------------|----------------------------------|-------|--------------------------------------|
| FeS                                             | 0.4 * 10 <sup>-4</sup>           |       | mol m <sup>-2</sup> yr <sup>-1</sup> |
| FeS <sub>2</sub>                                | 0                                |       | mol m <sup>-2</sup> yr <sup>-1</sup> |
| S <sup>0</sup>                                  | 0                                |       | mol m <sup>-2</sup> yr <sup>-1</sup> |
| FeCO <sub>3</sub>                               | 2                                |       | mol m <sup>-2</sup> yr <sup>-1</sup> |
| Fe <sub>3</sub> (PO <sub>4</sub> ) <sub>2</sub> | 0                                |       | mol m <sup>-2</sup> yr <sup>-1</sup> |
|                                                 | Min                              | Max   |                                      |
| OM <sup>a</sup>                                 | 9.51                             | 52.31 | mol m <sup>-2</sup> yr <sup>-1</sup> |
| OM <sup>b</sup>                                 | 45.36                            | 72.58 | mol m <sup>-2</sup> yr <sup>-1</sup> |
| OM <sup>g</sup>                                 | 0.001                            | 0.001 | mol m <sup>-2</sup> yr <sup>-1</sup> |
| Fe(OH) <sub>3</sub> <sup>a</sup>                | 0.0028                           | 6.44  | mol m <sup>-2</sup> yr <sup>-1</sup> |
| Fe(OH) <sub>3</sub> <sup>b</sup>                | 3.28                             | 4.68  | mol m <sup>-2</sup> yr <sup>-1</sup> |
| Fe(OH) <sub>3</sub> <sup>g</sup>                | 0                                | 0     | mol m <sup>-2</sup> yr <sup>-1</sup> |
| MnO <sub>2</sub> <sup>a</sup>                   | 0.0108                           | 0.081 | mol m <sup>-2</sup> yr <sup>-1</sup> |
| MnO <sub>2</sub> <sup>b</sup>                   | 0.0235                           | 0.216 | mol m <sup>-2</sup> yr <sup>-1</sup> |
| MnCO <sub>3</sub>                               | 0.0624                           | 0.163 | mol m <sup>-2</sup> yr <sup>-1</sup> |
| Solutes                                         | Bottom water concentrations      |       | Unit                                 |
|                                                 | Min                              | Max   |                                      |
| O <sub>2</sub>                                  | 0                                | 0.205 | mmol L <sup>-1</sup>                 |
| ΣH <sub>2</sub> S                               | 0                                | 0.111 | mmol L <sup>-1</sup>                 |
| Cl <sup>-</sup>                                 | 532                              |       | mmol L <sup>-1</sup>                 |
| NO <sub>3</sub> <sup>-</sup>                    | 0                                |       | mmol L <sup>-1</sup>                 |
| SO <sub>4</sub> <sup>2-</sup>                   | 27.49                            |       | mmol L <sup>-1</sup>                 |
| CH <sub>4</sub>                                 | 0                                |       | mmol L <sup>-1</sup>                 |
| Fe <sup>2+</sup>                                | 0                                |       | mmol L <sup>-1</sup>                 |
| ΣNH <sub>4</sub> <sup>+</sup>                   | 0                                |       | mmol L <sup>-1</sup>                 |
| ΣHPO <sub>4</sub> <sup>2-</sup>                 | 0                                |       | mmol L <sup>-1</sup>                 |
| DIC                                             | 3                                |       | mmol L <sup>-1</sup>                 |
| Mn <sup>2+</sup>                                | 0                                |       | mmol L <sup>-1</sup>                 |

|                  |   |                      |
|------------------|---|----------------------|
| Mn <sup>3+</sup> | 0 | mmol L <sup>-1</sup> |
|------------------|---|----------------------|

- Berg, P., Rysgaard, S., & Thamdrup, B. O. (2003). Dynamic Modeling of Early Diagenesis and Nutrient Cycling. A Case Study in an Arctic Marine Sediment. *American Journal of Science*, 303, 905–955.
- Boudreau, B. P. (1997). *Diagenetic models and their implementation : modelling transport and reactions in aquatic sediments*. Springer Berlin Heidelberg. <https://doi.org/10.1007/978-3-642-60421-8>
- Boudreau, P. (1996). A Method-of-Lines Code For Carbon and Nutrient Diagenesis in Aquatic Sediments. *Computers & Geoscience*, 22(5), 479–496.
- Burdige, D. J., Berelson, W. M., Coale, K. H., McManus, J., & Johnson, K. S. (1999). Fluxes of dissolved organic carbon from California continental margin sediments. *Geochimica et Cosmochimica Acta*, 63(10), 1507–1515.
- Burdige, D. J., Kline, S. W., & Chen, W. (2004). Fluorescent dissolved organic matter in marine sediment pore waters. *Marine Chemistry*, 89, 289–311. <https://doi.org/10.1016/j.marchem.2004.02.015>
- Egger, M., Kraal, P., Jilbert, T., Sulu-gambari, F., Sapart, C. J., & Röckmann, T. (2016a). Anaerobic oxidation of methane alters sediment records of sulfur , iron and phosphorus in the Black Sea. *Biogeosciences*, 5333–5355. <https://doi.org/10.5194/bg-13-5333-2016>
- Egger, M., Lenstra, W., Jong, D., Meysman, F. J. R., Sapart, C. J., Van Der Veen, C., Röckmann, T., Gonzalez, S., & Slomp, C. P. (2016b). Rapid sediment accumulation results in high methane effluxes from coastal sediments. *PLoS ONE*, 11(8), 1–22. <https://doi.org/10.1371/journal.pone.0161609>
- Froelich, P. N., Klinkhammer, G. P., Bender, M. L., Luedtke, N. A., Heath, G. R., Cullen, D., Dauphin, P., Hammond, D., & Hartman, B. (1979). Early oxidation of organic matter in pelagic sediments of the eastern equatorial Atlantic : suboxic diagenesis. *Geochimica et Cosmochimica Acta*, 43, 1075–1090.
- Lenstra, W. K., Egger, M., Helmond, N. A. G. M. Van, Kritzberg, E., & Conley, D. J. (2018). Large variations in iron input to an oligotrophic Baltic Sea estuary : impact on sedimentary phosphorus burial. *Biogeosciences*, 6979–6996.
- Meysman, F. J. R., Boudreau, B. P., & Middelburg, J. J. (2005). Modeling reactive transport in sediments subject to bioturbation and compaction. *Geochimica et Cosmochimica Acta*, 69(14), 3601–3617. <https://doi.org/10.1016/j.gca.2005.01.004>
- Moodley, L., Middelburg, J. J., Herman, P. M. J., Soetaert, K., & de Lange, G. J. (2005). Oxygenation and organic-matter preservation in marine sediments : Direct experimental evidence from ancient organic carbon – rich deposits. *Geology*, 11, 889–892. <https://doi.org/10.1130/G21731.1>
- Reed, D. C., Gustafsson, B. G., & Slomp, C. P. (2016). Shelf-to-basin iron shuttling enhances vivianite formation in deep Baltic Sea sediments. *Earth and Planetary Science Letters*, 434, 241–251. <https://doi.org/10.1016/j.epsl.2015.11.033>
- Reed, D. C., Slomp, C. P., & de Lange, G. J. (2011a). A quantitative reconstruction of organic matter and nutrient diagenesis in Mediterranean Sea sediments over the Holocene. *Geochimica et Cosmochimica Acta*, 75(19), 5540–5558.

<https://doi.org/10.1016/j.gca.2011.07.002>

- 160 Reed, D. C., Slomp, C. P., & Gustafsson, B. G. (2011b). Sedimentary phosphorus dynamics and the evolution of bottom-water hypoxia: A coupled benthic-pelagic model of a coastal system. *Limnology and Oceanography*, 56(3), 1075–1092. <https://doi.org/10.4319/lo.2011.56.3.1075>
- Rickard, D. (1997). Kinetics of pyrite formation by the H<sub>2</sub>S oxidation of iron ( II ) monosulfide in aqueous solutions between 25 and 125 ° C : The rate equation. *Geochimica et Cosmochimica Acta*, 61(1), 115–134.
- 165 Rooze, J., Egger, M., Tsandev, I., & Slomp, C. P. (2016). Iron-dependent anaerobic oxidation of methane in coastal surface sediments: Potential controls and impact. *Limnology and Oceanography*, 61(1), S267–S282. <https://doi.org/10.1002/lno.10275>
- Soetaert, K., & Meysman, F. (2012). Environmental Modelling & Software Reactive transport in aquatic ecosystems : Rapid model prototyping in the open source software R. *Environmental Modelling and Software*, 32, 49–60. <https://doi.org/10.1016/j.envsoft.2011.08.011>
- 170 Soetaert, K., Petzoldt, T., & Meysman, F. (2010). *marelac : Tools for Aquatic Sciences*.
- Van Cappellen, P., & Wang, Y. (1996). Cycling of iron and manganese in surface sediments: a general theory for the coupled transport and reaction of carbon, oxygen, nitrogen, sulfur, iron and manganese. *American Journal of Science*, 296(March), 197–243.
- 175 Żygadłowska, O. M., Venetz, J., Klomp, R., Lenstra, W. K., Van Helmond, N. A. G. M., Röckmann, T., Wallenius, A. J., Dalcin Martins, P., Veraart, A. J., Jetten, M. S. M., & Slomp, C. P. (2023). Pathways of methane removal in the sediment and water column of a seasonally anoxic eutrophic marine basin. *Frontiers in Marine Science*, January, 1–15. <https://doi.org/10.3389/fmars.2023.1085728>
